# Supplementary material for: Catalytic modification in dehydrogenation properties of KSiH3
Source: Royal Society of Chemistry journal article supplement (doi:10.1039/c4cp03067b), 2014-01-01
Supplement: c4cp03067b1.pdf [file c4cp03067b1.pdf]

## **Catalytic Modification in Dehydrogenation Properties of $\text{KSiH}_3$ (Electronic Supplementary Information)**

Ankur Jain<sup>a#</sup>, Takayuki Ichikawa<sup>a\*</sup>, Shotaro Yamaguchi<sup>b</sup>, Hiroki Miyaoka<sup>c</sup>, and Yoshitsugu Kojima<sup>a</sup>

<sup>a</sup>Institute for Advanced Materials Research, Hiroshima University, Higashi-Hiroshima 739-8530, Japan.

<sup>b</sup>Graduate school of Advanced Sciences of Matter, Hiroshima University, Higashi-Hiroshima 739-8530, Japan

<sup>c</sup>Institute for Sustainable Sciences and Development, Hiroshima University, Higashi-Hiroshima 739-8530, Japan

Tel & Fax: +81-(0)82-424-5744

E-mail: #ankur.j.ankur@gmail.com (A. Jain); \* tichi@hiroshima-u.ac.jp (T. Ichikawa)

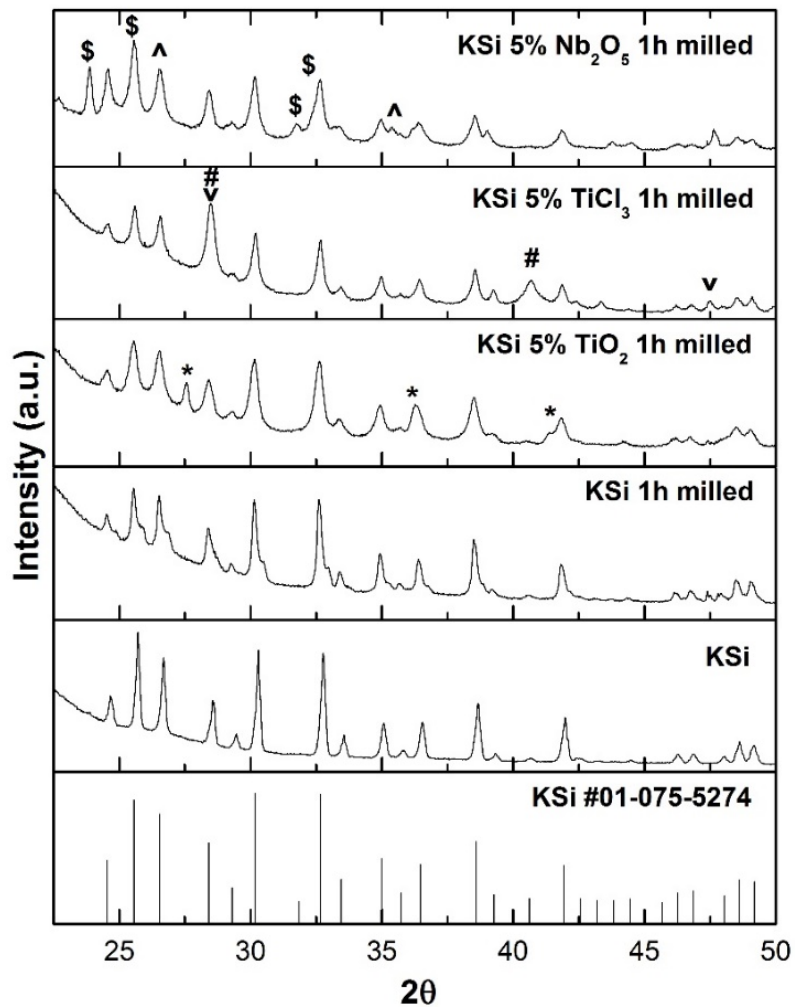

**Fig. 1** XRD pattern of pristine and milled KSi with / without catalysts. Different phases are indexed by symbols (shown in brackets) as follows: TiO<sub>2</sub> # 01-084-1284 (\*); KCl # 00-004-0587 (#); Nb<sub>2</sub>O<sub>5</sub> # 00-019-0862 (\$); NbO<sub>2</sub> # 01-071-4836 (^); Si # 01-080-0018 (v).

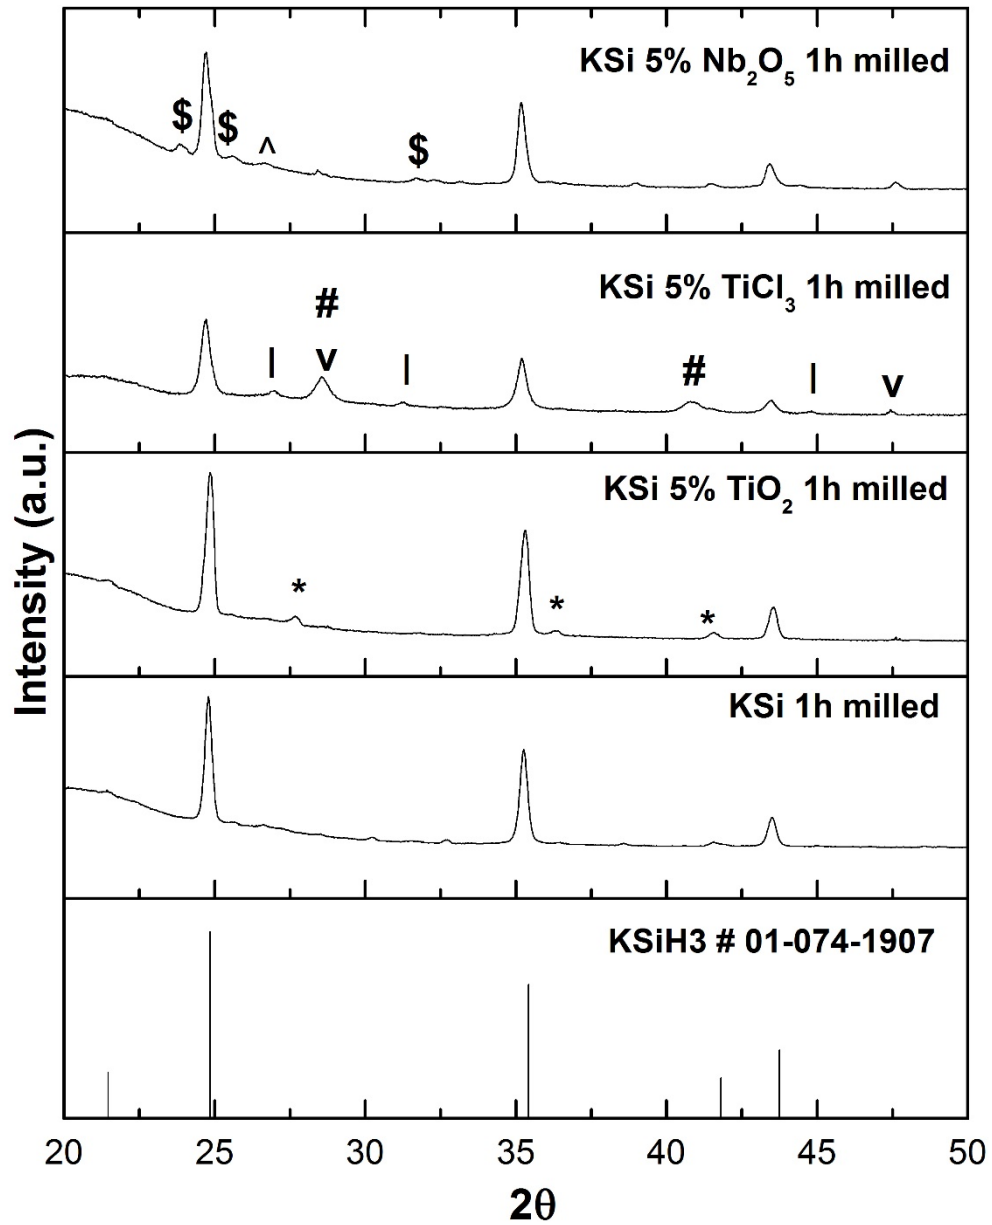

**Fig. 2** XRD pattern of all hydrogenated KSi sample. Different phases are indexed by symbols (shown in brackets) as follows: TiO<sub>2</sub> # 01-084-1284 (\*); KCl # 00-004-0587 (#); KH # 00-000-1263 (|); Nb<sub>2</sub>O<sub>5</sub> # 00-019-0862 (\$); NbO<sub>2</sub> # 01-071-4836 (^); Si # 01-080-0018 (v).

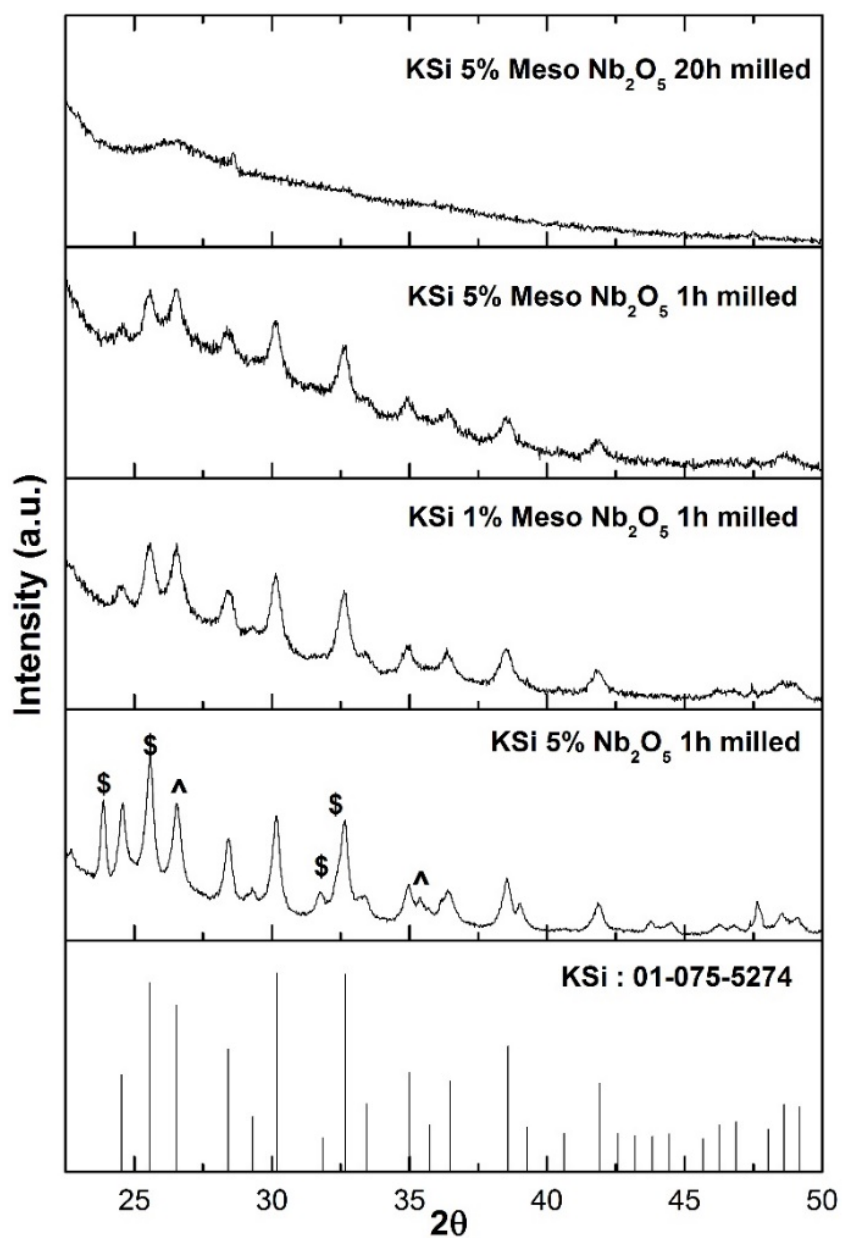

**Fig. 3** XRD pattern of milled KSi samples with Nb<sub>2</sub>O<sub>5</sub> by varying the the catalyst amount, milling time and particle size of catalyst. Different phases are indexed by symbols (shown in brackets) as follows: Nb<sub>2</sub>O<sub>5</sub> # 00-019-0862 (\$); NbO<sub>2</sub> # 01-071-4836 (^).

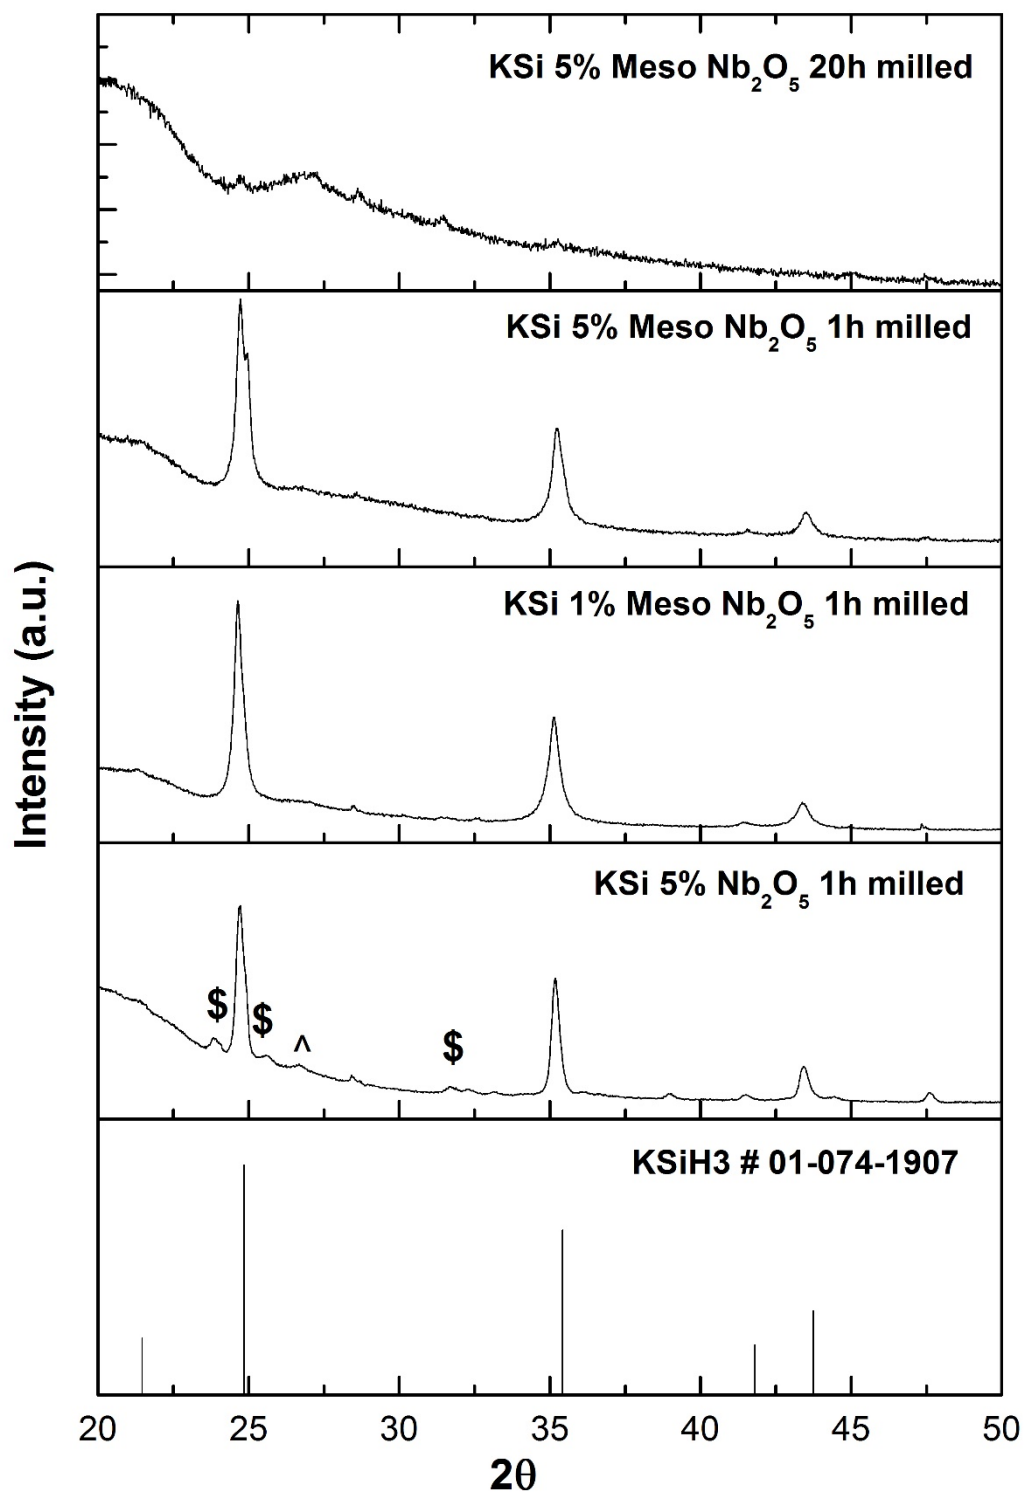

**Fig. 4** XRD pattern of milled KSi samples with  $\text{Nb}_2\text{O}_5$  by varying the catalyst amount, milling time and particle size of catalyst after hydrogenation. Different phases are indexed by symbols (shown in brackets) as follows:  $\text{Nb}_2\text{O}_5$  # 00-019-0862 (\$);  $\text{NbO}_2$  # 01-071-4836 (^).

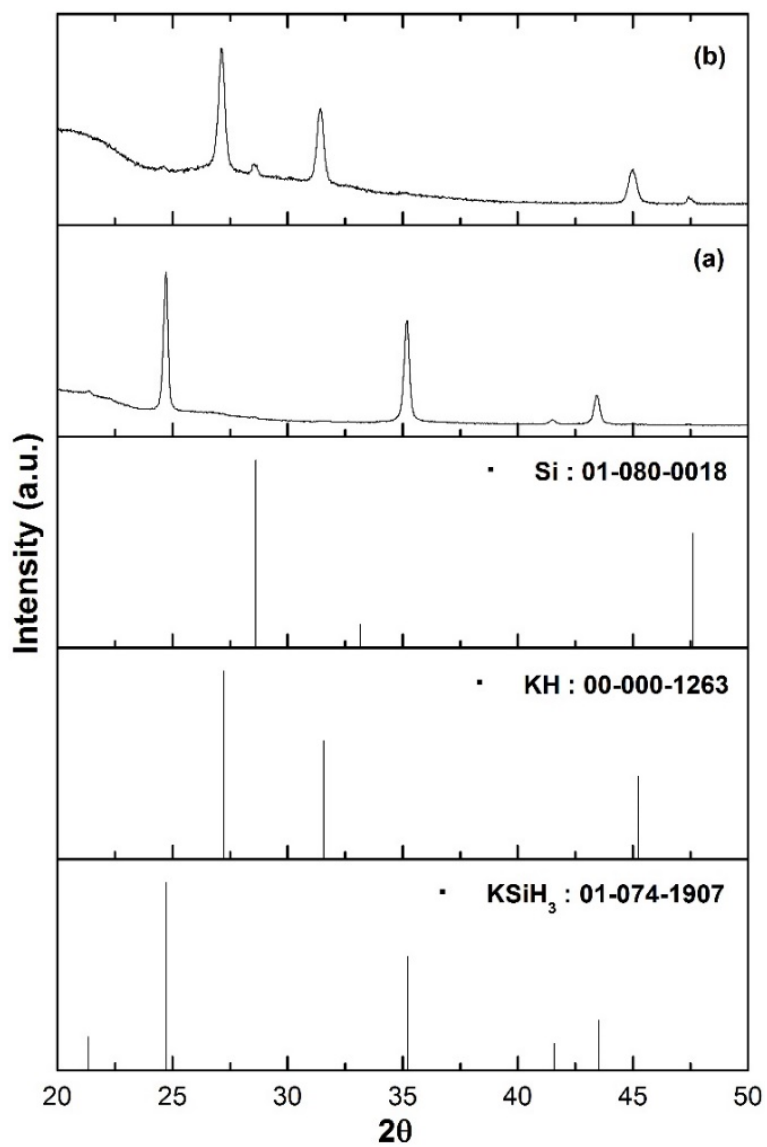

**Fig. 5** XRD pattern of 1h milled KSi sample after hydrogenation following two different reaction environment (a) heated upto 100°C with heating rate 10 °C/min after filling 5 MPa hydrogen (b) heating upto 100°C with heating rate 10 °C/min under vacuum then introduce 5 MPa hydrogen instantly.

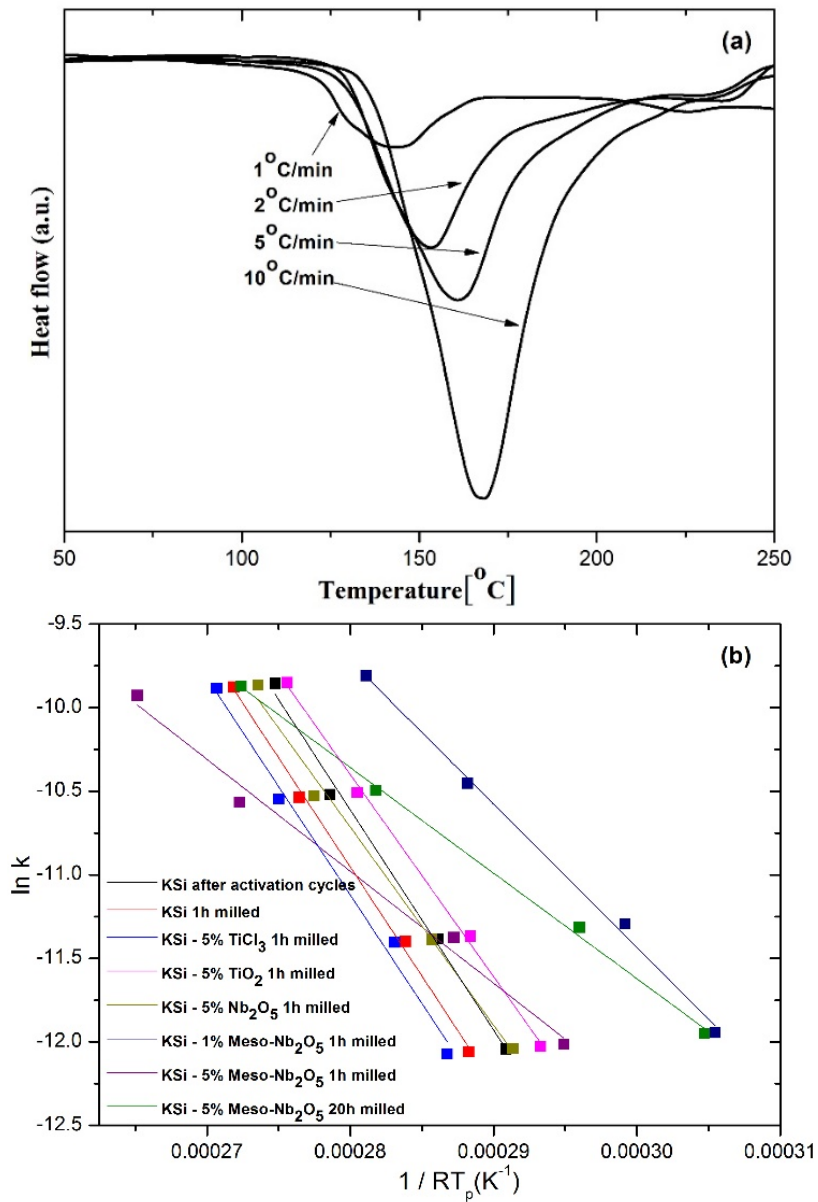

**Fig. 6** (a) DSC curve of hydrogenated 1h milled KSi sample under 0.1 MPa Ar at 1, 2, 5, 10°C/min; (b) Kissinger plots using peak temperatures at different heating rates.

**Table 1** Activation Energy corresponding to  $\text{KSiH}_3 \rightarrow \text{KSi}$  conversion for all the samples

| <b>S. No.</b> | <b>Sample</b>                                            | <b>Desorption Activation Energy <math>E_{\text{des}}</math> (<math>\text{kJmol}^{-1}</math>)</b> |
|---------------|----------------------------------------------------------|--------------------------------------------------------------------------------------------------|
| <b>1</b>      | KSi after activation cycles                              | $141.88 \pm 6.67$                                                                                |
| <b>2</b>      | 1h milled KSi                                            | $130.58 \pm 4.57$                                                                                |
| <b>3</b>      | KSi – 5% $\text{TiCl}_3$ (1h milled)                     | $129.861 \pm 8.82$                                                                               |
| <b>4</b>      | KSi – 5% $\text{TiO}_2$ (1h milled)                      | $120.93 \pm 3.72$                                                                                |
| <b>5</b>      | KSi – 5% normal $\text{Nb}_2\text{O}_5$ (1h milled)      | $118.59 \pm 7.32$                                                                                |
| <b>6</b>      | KSi – 1% Mesoporous $\text{Nb}_2\text{O}_5$ (1h milled)  | $85.77 \pm 3.34$                                                                                 |
| <b>7</b>      | KSi – 5% Mesoporous $\text{Nb}_2\text{O}_5$ (1h milled)  | $66.99 \pm 4.624$                                                                                |
| <b>8</b>      | KSi – 5% Mesoporous $\text{Nb}_2\text{O}_5$ (20h milled) | $63.18 \pm 1.91$                                                                                 |
